# Supplementary material for: A spiropyran-based X-ray sensitive fiber
Source: Royal Society of Chemistry journal article supplement (doi:10.1039/c5cc03977k), 2015-01-01
Supplement: c5cc03977k1.pdf [file c5cc03977k1.pdf]

## Supplementary Information for Spiropyran-based X-ray sensitive fiber

Kenji Kinashi <sup>a\*</sup>, Yurika Miyamae <sup>a</sup>, Ryotaro Nakamura <sup>a</sup>, Wataru Sakai <sup>a</sup>, Naoto Tsutsumi <sup>a</sup>, Hideki Yamane <sup>b</sup>, Gaku Hatsukano <sup>b</sup>, Makoto Ozaki <sup>c</sup>, Kazuya Jimbo <sup>d</sup>, Takahiro Okabe <sup>d</sup>.

<sup>a</sup> *Department of Macromolecular Science and Engineering, Graduate School of Science and Technology, Kyoto Institute of Technology, Matsugasaki, Sakyo, Kyoto 606-8585, Japan*

<sup>b</sup> *Department of Biobased Materials Science, Graduate School of Science and Technology, Kyoto Institute of Technology, Matsugasaki, Sakyo, Kyoto 606-8585, Japan*

<sup>c</sup> *Advanced Technology Center, Kyoto Institute of Technology, Matsugasaki, Sakyo, Kyoto 606-8585, Japan*

<sup>d</sup> *NISSHA PRINTING CO.,LTD, 3 Mibu, Hanai,Nakagyo, Kyoto 604-8551 Japan*

### Experimental

The Fricke solution was prepared with 112 mg of iron(II) sulfate heptahydrate (Wako Pure Chemical Industry, Ltd.), and 8.26 g of concentrated sulfuric acid diluted in aerated distilled water (corresponding to 0.4 M H<sub>2</sub>SO<sub>4</sub> aqueous solution).

The Fricke solution was placed on the same position so that the irradiation conditions were equivalent to the 6-nitro BIPS-dyed composite fiber. The measurement of absorbance was performed using a spectrophotometer (Perkin-Elmer Co., Lambda 1050UV/Vis/NIR). The change in optical density measured with a spectrophotometer with good optical properties is equal to the change in absorbance. The absorbed dose to the Fricke solution  $D_F$  is obtained from the change in absorbance  $\Delta A$  as:

$$D_F = \frac{\Delta A}{\rho l \varepsilon G(Fe^{3+})},$$

where  $\Delta A$  is the change in absorbance at 304 nm,  $\rho$  is the density of the Fricke solution,  $\ell$  is the optical pathlength,  $\varepsilon$  is the molar extinction coefficient of  $\text{Fe}^{3+}$ , and  $G(\text{Fe}^{3+})$  is the  $\text{Fe}^{3+}$  ion yield. The absorbed dose to water  $D_w$  is obtained as

$$D_w = 1.004D_F.$$

For the Fricke solution, we use the values of 1 cm for  $\ell$ ,  $1.023 \times 10^6 \text{ g m}^{-3}$  for  $\rho$ ,  $2196 \text{ M}^{-1} \text{ cm}^{-1}$  for  $\varepsilon$ , and 15.5 for  $G(\text{Fe}^{3+})$ , and a product of  $\varepsilon G(\text{Fe}^{3+}) = 3.4 \text{ m}^2 \text{ g}^{-1} \text{ Gy}^{-1}$ , the expressions reduce to

$$D_w = 278\Delta A.$$

It has been reported that  $G(\text{Fe}^{3+})$  at around 25 °C decreases by 0.12% for a 1°C decrease in the irradiation temperature  $T_{\text{irrad}}$ , and  $\varepsilon$  decreases by 0.69% for a 1°C decrease in the reading temperature  $T_{\text{read}}$ .

Accordingly, the absorbed dose can be corrected more accurately by using the above relationships.<sup>S1,S2</sup>

The compensation equation is eventually expressed as follows:

$$D_w = 278\Delta A[(1 + 0.0069(25 - T_{\text{read}})) \times (1 + 0.00125(25 - T_{\text{irrad}}))].$$

**Figure S1** shows absorption spectra of the Fricke solution before and after X-ray exposure. The absorption intensities at 304 nm before and after X-ray exposure show 0.017 and 0.043, respectively. The experiments were conducted at 19 °C, and the absorbed dose from an X-ray diffractometer (Rigaku ZSX Primus II, Japan) was accordingly estimated to be 7.41 Gy.

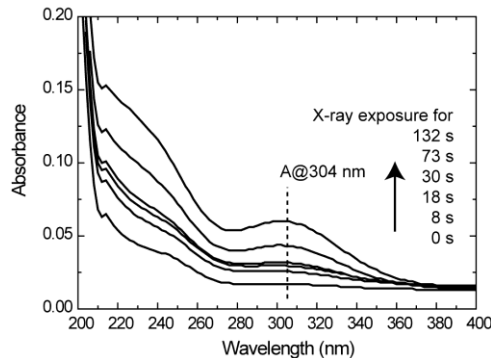

**Figure S1.** Absorption spectra of the Fricke solution before and after X-ray exposure.

## REFERENCES

[S1] IRS (2002), A. Olszanski, A., Klassen, N. V., Ross C. K., and Shortt, K. R., “The IRS Fricke Dosimetry System”, Ionizing Radiation Standards, Institute for National Measurement Standards, National Research Council, PIRS- 0815, Ottawa, Ontario.

[S2] International Atomic Energy Agency (1977) “Manual of Food Irradiation Dosimetry”, TRS 178, IAEA, Vienna.
